# Supplementary material
Source: publisher figshare collection journal article supplement (https://tandf.figshare.com/articles/dataset/_/25452325)
Supplement: Supplementary file 1 [file 1]

# A sex-specific pathway linking early life maltreatment, vagal activity, and depressive symptoms - Supplementary Figures

Christine Sigrist

2023-09-13

## This file

The purpose of this file is to present the online supplementary figures that accompany the study entitled “A sex-specific pathway linking early life maltreatment, vagal activity, and depressive symptoms,” authored by Sigrist et al. (2023).

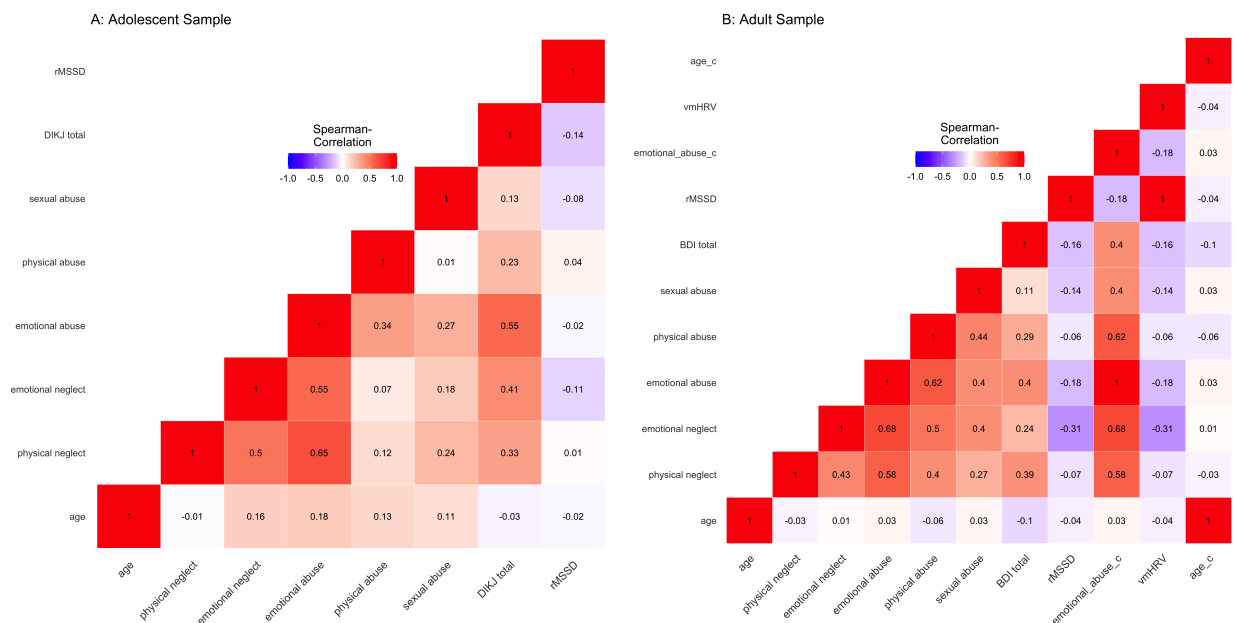

Supplementary Figure 1. Correlation matrices showing bivariate Spearman's correlation coefficients between variables of interest in the adolescent (A) and adult (B) sample.

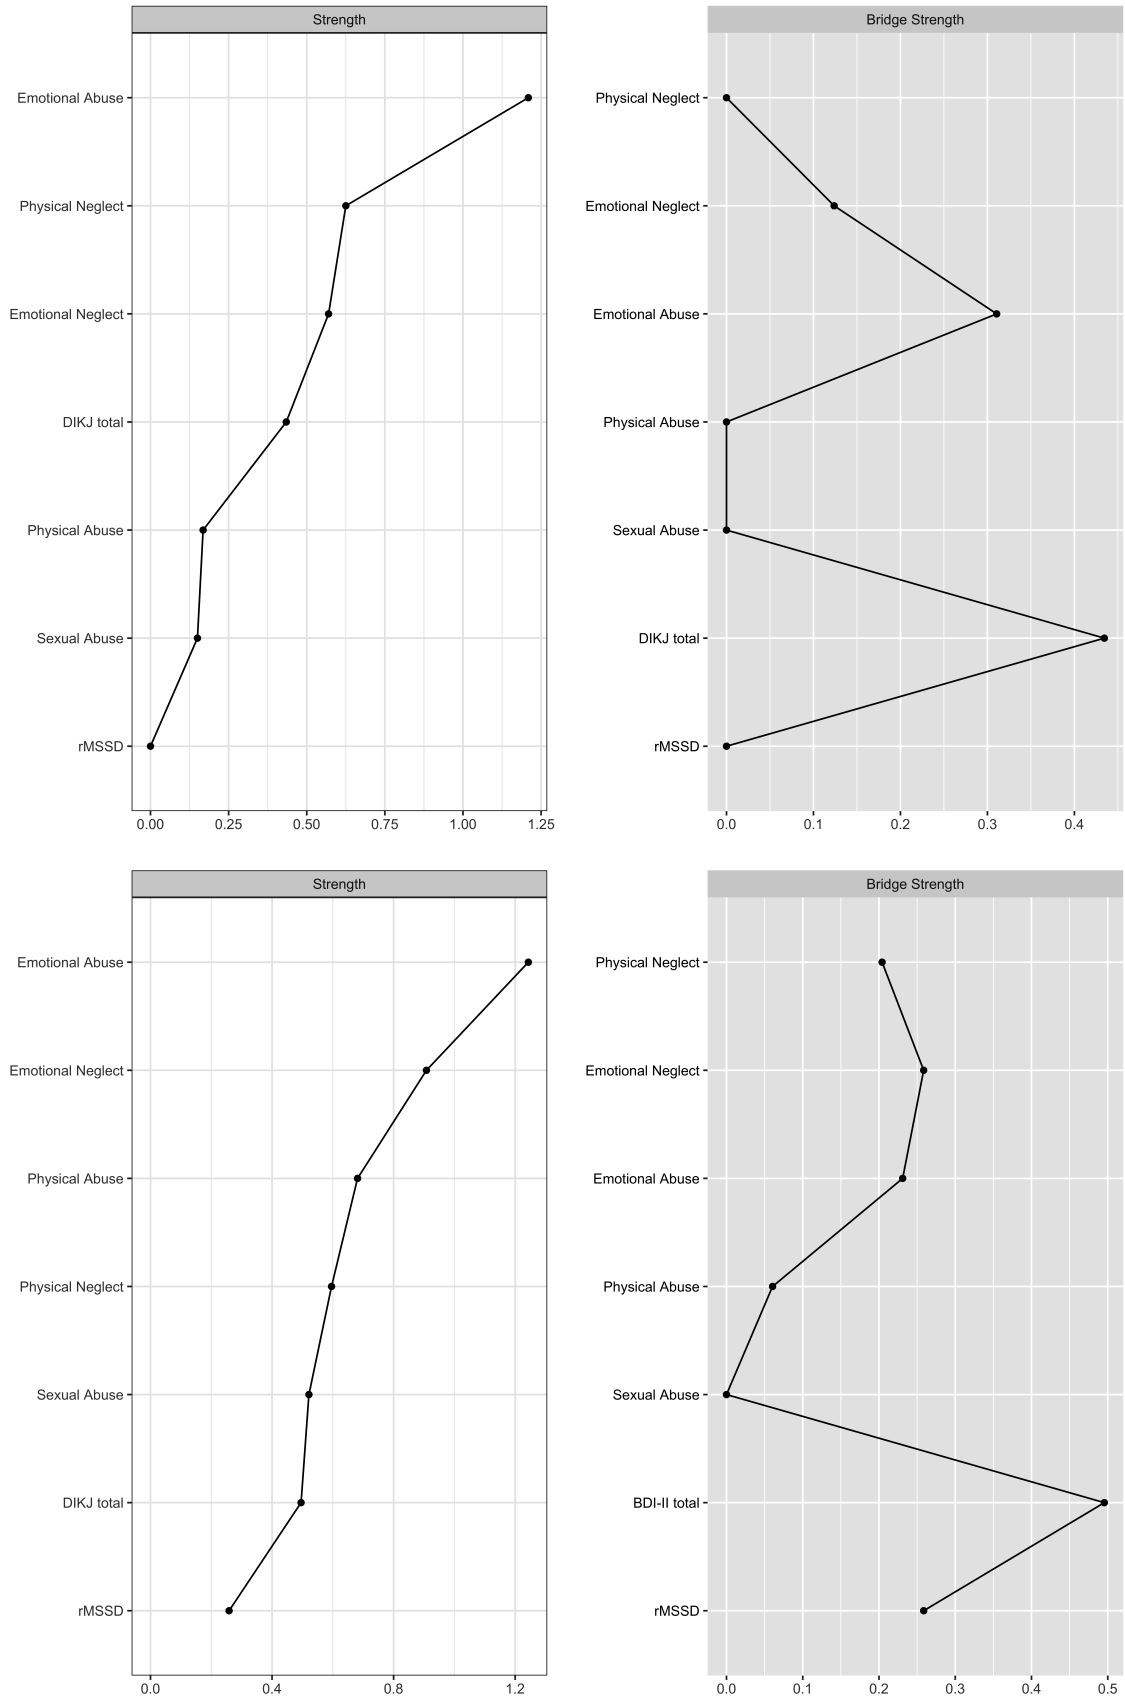

Supplementary Figure 2. Node strength centrality (left panels) and bridge strength centrality (right panels) in the adolescent (upper) and adult (lower) network.

A: Adolescent Sample

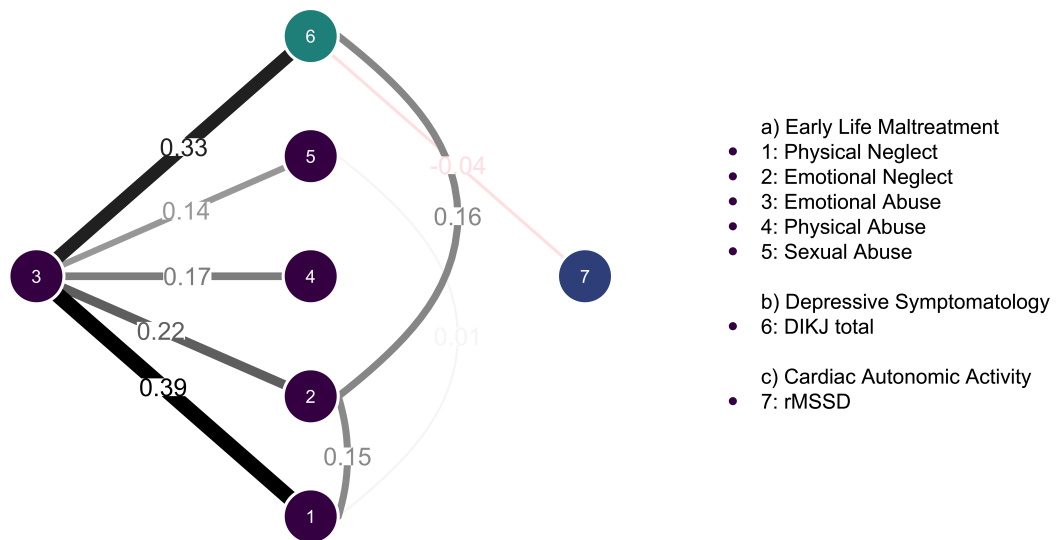

B: Adult Sample

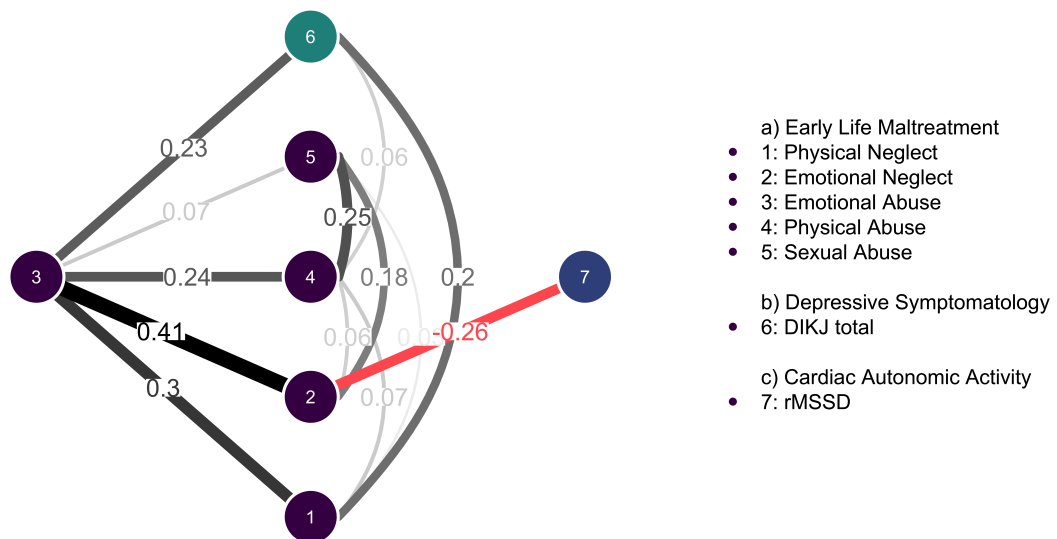

Supplementary Figure 3. Emotional abuse (node 3) pathways to all other nodes in the network. Red lines indicate negative partial correlations; black lines indicate positive partial correlations. The more saturated the edge, the stronger the association.

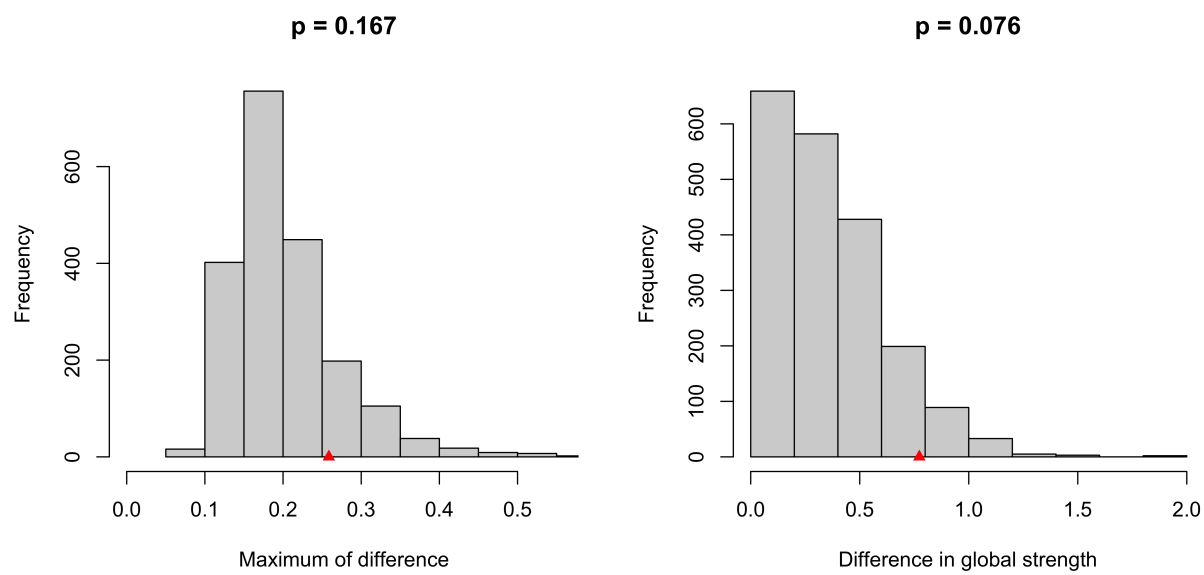

Supplementary Figure 4. Results of the Network Comparison Test between the adolescent and the adult network. Both the network invariance test and the global invariance test results revealed the networks in both age groups were statistically similar.



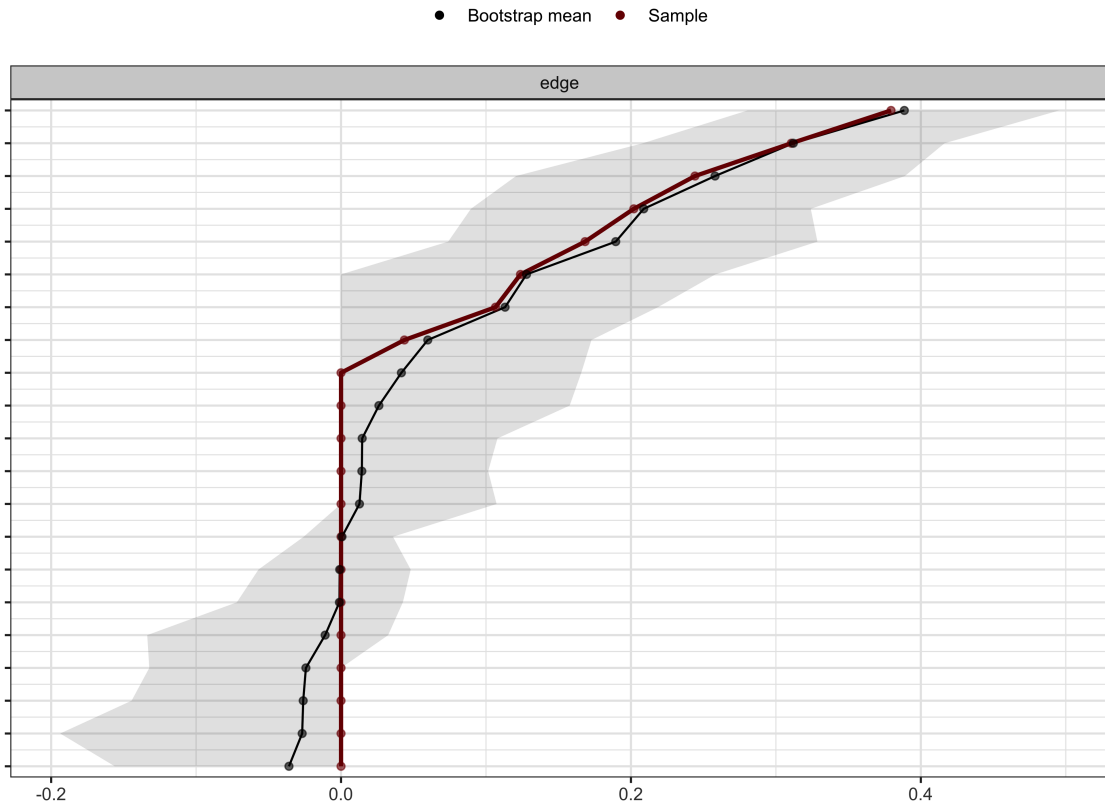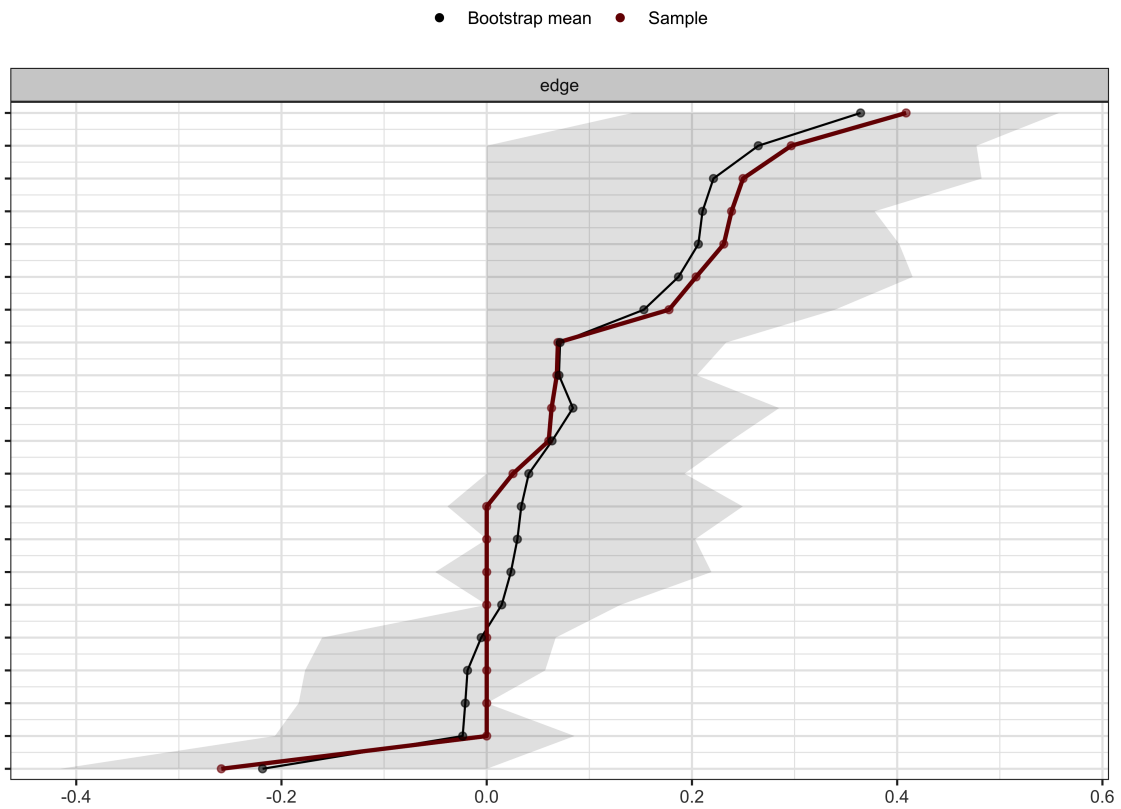

Supplementary Figure 5. Edge weight accuracy for the adolescent (upper) and adult (lower) networks calculated by using the R-package bootnet.

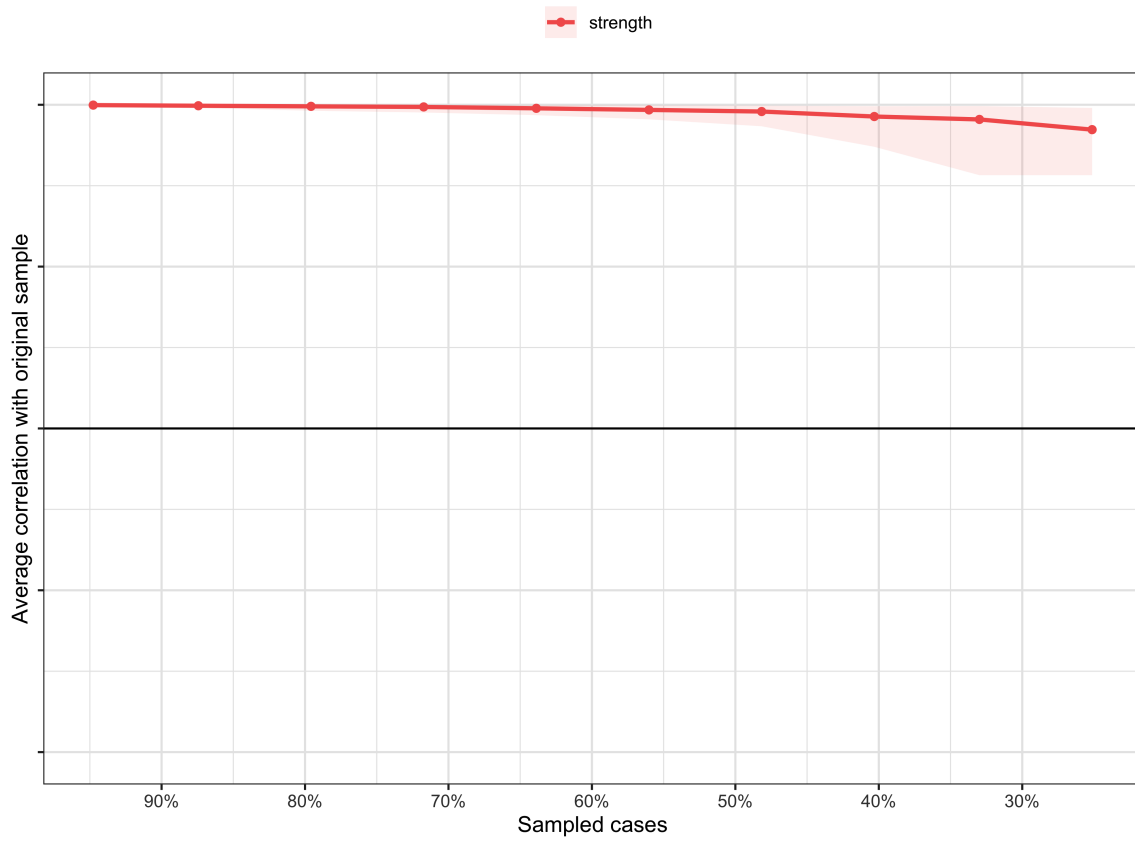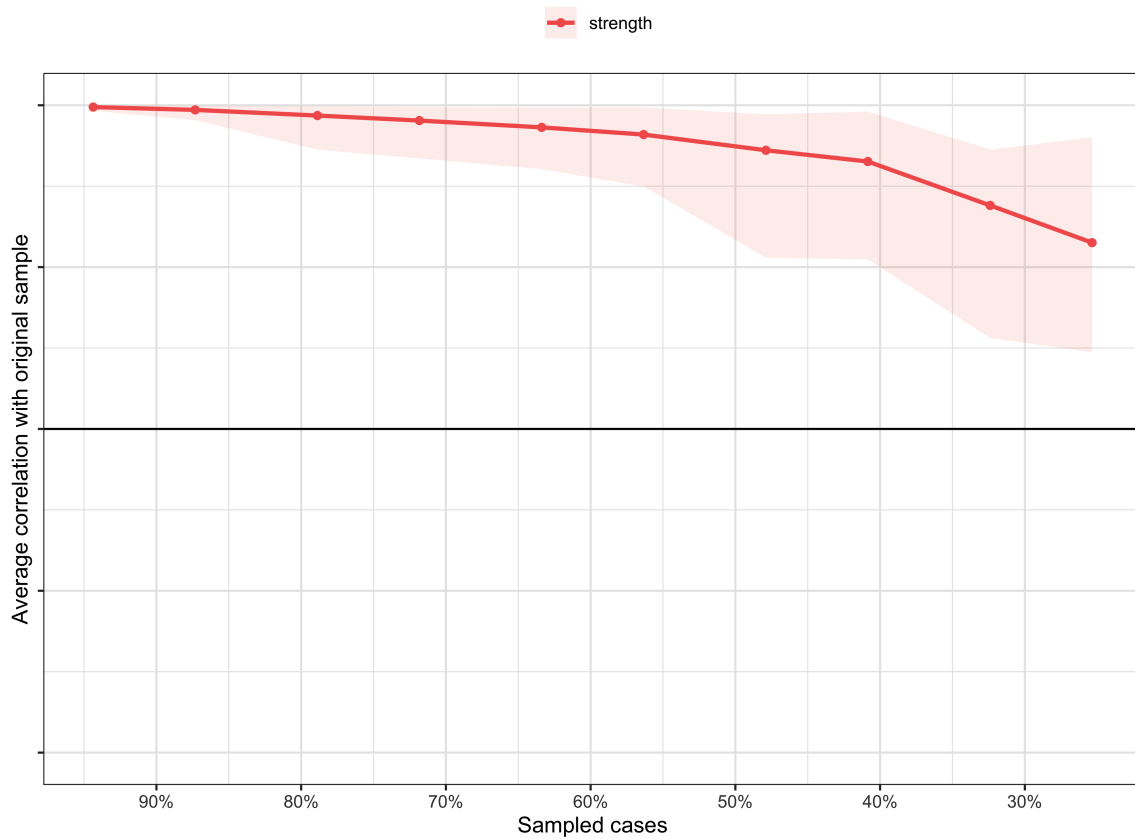

Supplementary Figure 6. Node strength stability for the adolescent (upper) and adult (lower) networks calculated by using the R-package bootnet.

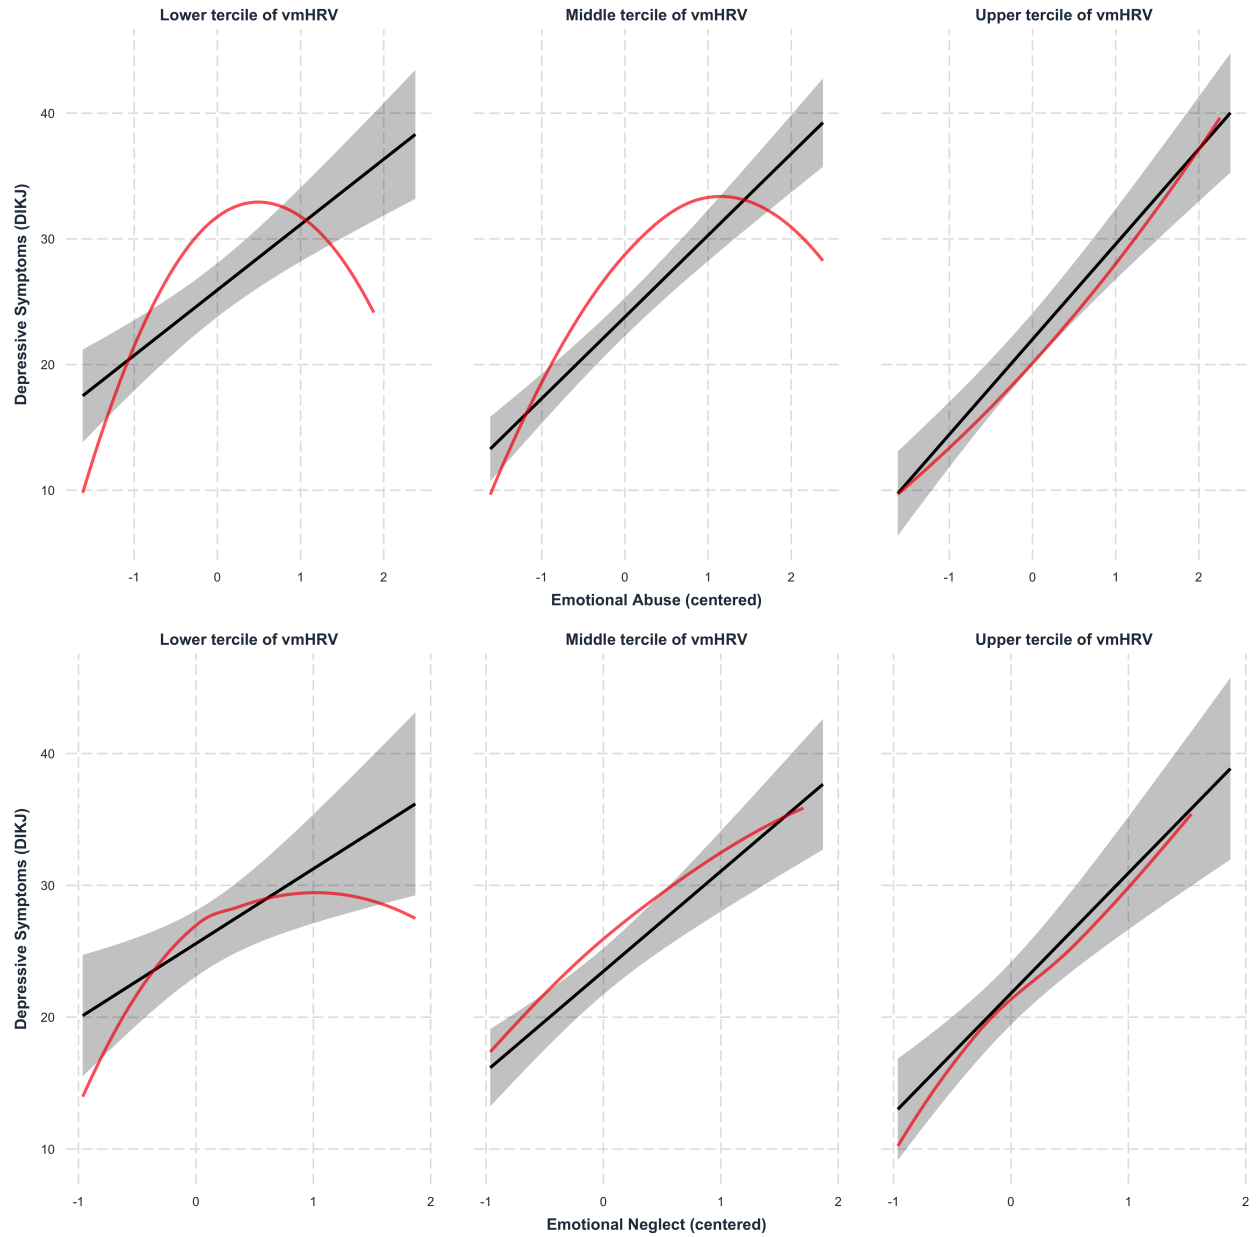

Supplementary Figure 7. Visual linearity checks of tested interactions in the multiple linear regression models in the adolescent sample.

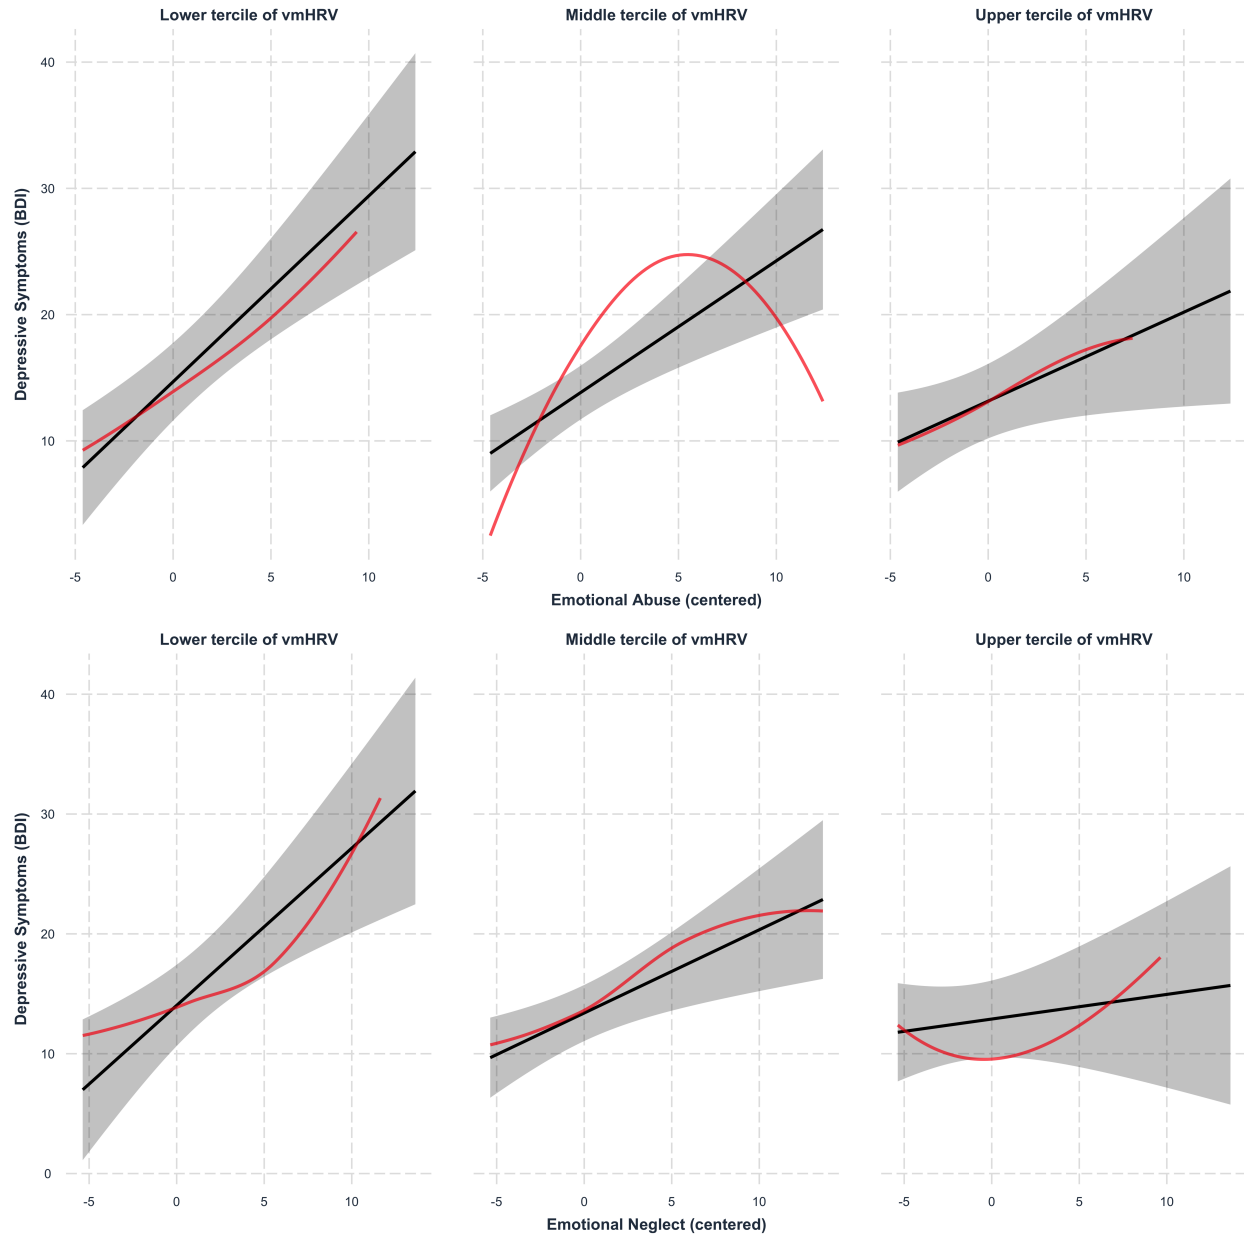

Supplementary Figure 8. Visual linearity checks of tested interactions in the multiple linear regression models in the adult sample.
